# Supplementary material
Source: Springer Nature journal article supplement (https://www.springermedizin.de/resource/supplementary/12886_2013_508_MOESM1_ESM.pdf/9474038)

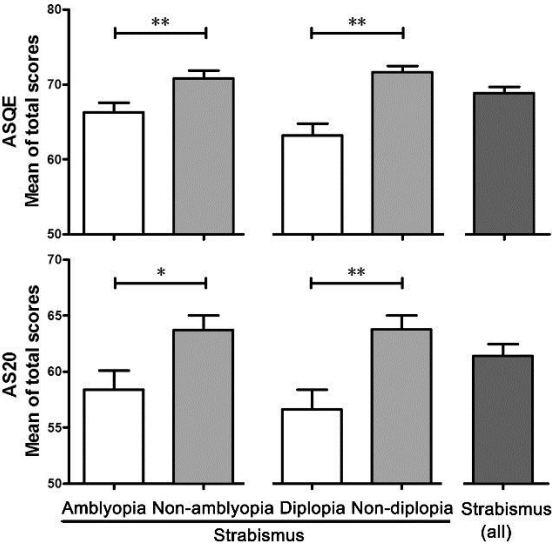

Supplement: MOESM1 [file 9474038]
